# Supplementary material
Source: publisher figshare collection journal article supplement (https://rs.figshare.com/ndownloader/files/21697623)
Supplement: Supplementary file 1 [file 21697623]

**Supplementary Table S1.** Strains used in this study.

| *Pseudomonas stutzeri* strain | Relevant characteristics | Reference |
| --- | --- | --- |
| A1601cfp | A1501 with Δ*comA* and mini-Tn7T-LAC-Gm-*ecfp*; GmR, ecfp+ | 22, 54, 55 |
| A1601gfp | A1501 with Δ*comA* and mini-Tn7T-LAC-Gm-*egfp*; GmR, egfp+ | 22, 54, 55 |
| A1603cfp | A1503 with Δ*comA*, Δ*nirS* and mini-Tn7T-LAC-Gm-*ecfp*; GmR, ecfp+ | 22, 54 |
| A1602gfp | A1502 with Δ*comA*, Δ*narG* and mini-Tn7T-LAC-Gm-*egfp*; GmR, egfp+ | 22, 54 |
